# Supplementary material for: Ethylene Induction of Non-Enzymatic Metabolic Antioxidants in Matricaria chamomilla
Source: MDPI journal article supplement (doi:10.3390/molecules25235720), 2020-12-03
Supplement: s1 [file s1]

**Table S1:** The predicted molecular properties confined to the druglike properties (based on Lipinski's rule of five).

| <i>Molinspiration server predictions</i> |           |                  |        |          |
|------------------------------------------|-----------|------------------|--------|----------|
|                                          |           | chlorogenic acid | 5-FQA  | 1,5-DCQA |
| miLogP                                   |           | -0.45            | -0.14  | 1.42     |
| TPSA                                     |           | 164.74           | 153.75 | 211.28   |
| Mol. Wt                                  |           | 354.51           | 368.34 | 516.46   |
| nON                                      |           | 9                | 9      | 12       |
| nOHNH                                    |           | 6                | 5      | 7        |
| nviolations                              |           | 1                | 0      | 3        |
| nrotb                                    |           | 5                | 6      | 9        |
| <i>SwissTargetPrediction</i>             |           |                  |        |          |
| <i>target protein</i>                    |           |                  |        |          |
| Enzyme                                   | Aldose    | 1.00             | 0.28   | 0.53     |
| reductase                                |           |                  |        |          |
| Enzyme                                   | Aldo-keto | 1.00             | 0.12   | 0.35     |
| reductase                                | family 1  |                  |        |          |
| member B10                               |           |                  |        |          |
| Protease                                 | Matrix    | 0.18             | 0.17   | 0.22     |
| metalloproteinase 2                      |           |                  |        |          |

The molecular properties for the compounds are predicted at molinspiration server to define the compounds druglikeness. miLogP - Octanol-water partition coefficient; TPSA- topological polar surface area (drug transport properties); Mol. Wt ( $\text{g mol}^{-1}$ ) - molecular weight, nON - number of hydrogen bond acceptors; nOHNH - number of hydrogen bond donors; nviolations - number of Lipinski's rule of five parameters violations; nrotb - number of rotatable bonds (molecular flexibility)
