# Supplementary material for: Ethylene Induction of Non-Enzymatic Metabolic Antioxidants in Matricaria chamomilla
Source: MDPI journal article supplement (doi:10.3390/molecules25235720), 2020-12-03

**Figure S1.** Potential electrostatic maps (MEP) of selected quinic acid derivatives.

**5-*O*-feruloylquinic acid**

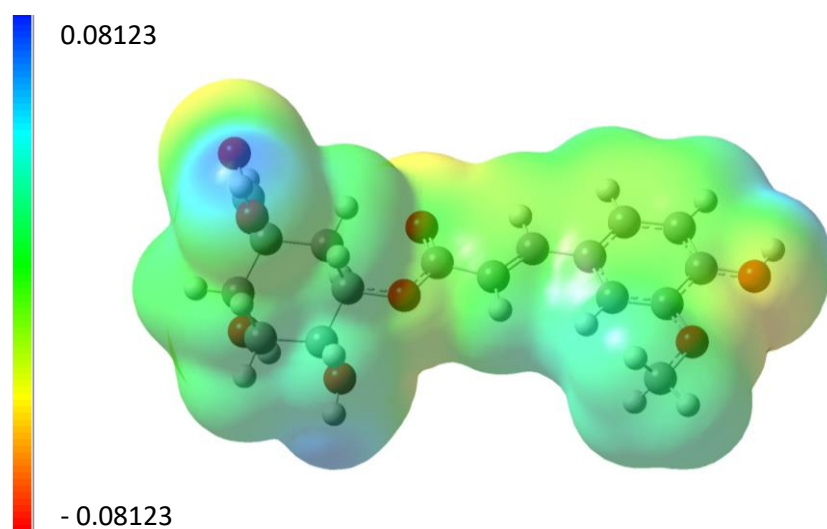

**chlorogenic acid**

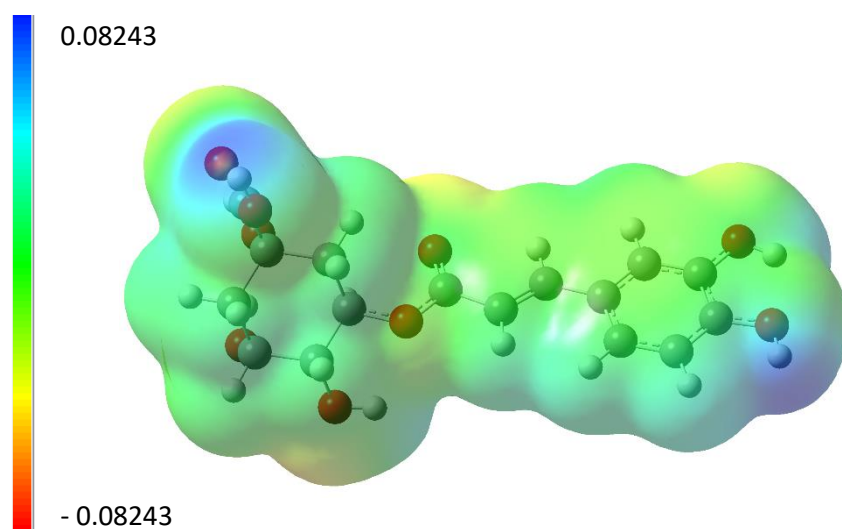

# 1,5-dicaffeoylquinic acid

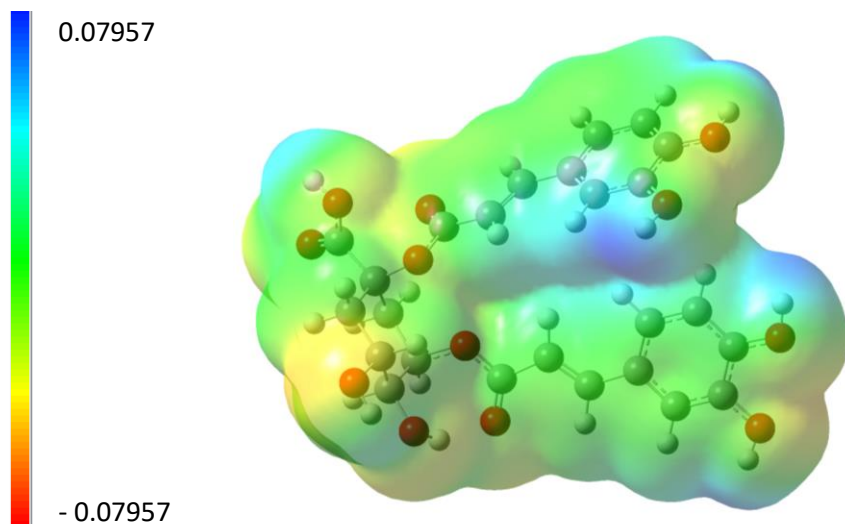

Supplement: s1 [file s1]
