# Supplementary material for: Ethylene Induction of Non-Enzymatic Metabolic Antioxidants in Matricaria chamomilla
Source: MDPI journal article supplement (doi:10.3390/molecules25235720), 2020-12-03
Supplement: s1 [file s1]

**Figure S2.** The frontier orbital HOMO and LUMO of selected quinic acid derivatives.

**5-O-feruloylquinic acid**

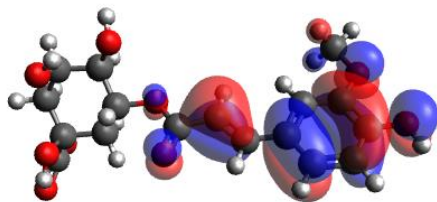

**HOMO -5.648**

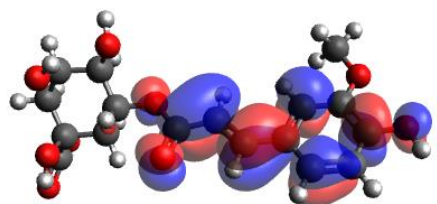

**LUMO -1.517**

**chlorogenic acid**

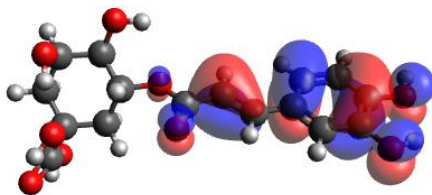

**HOMO -5.888**

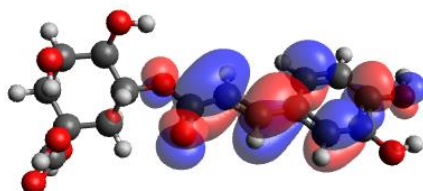

**LUMO -1.728**

**1,5-dicaffeoylquinic acid**

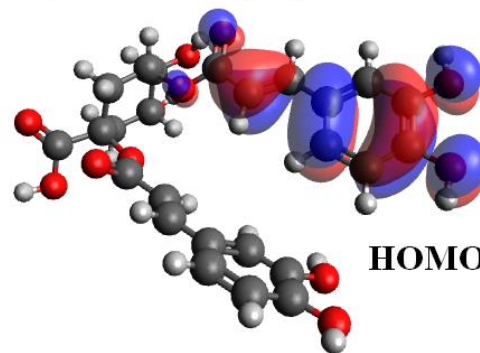

**HOMO -5.484**

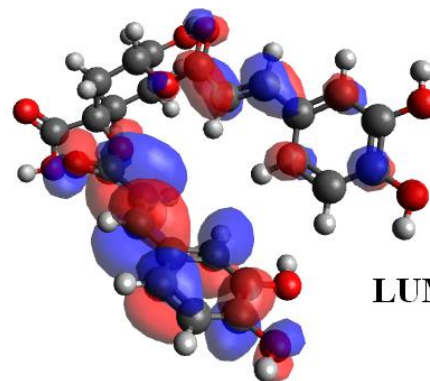

**LUMO -1.937**
